# Supplementary material for: Clostridioides difficile canonical L,D-transpeptidases catalyze a novel type of peptidoglycan cross-links and are not required for beta-lactam resistance
Source: PubMed Central journal article supplement (PMC10792238; doi:10.1016/j.jbc.2023.105529), 2023-12-01
Supplement: mmc4.pdf [file mmc4.pdf]

**Table S1.** Chemical shift assignments for the dimer peptidoglycan fragment **a**.

| <sup>1</sup> H signal        | Chemical shift (ppm)   |
|------------------------------|------------------------|
| GlcNAc amide                 | 8.35                   |
| GlcNAc methyl                | 2.08                   |
| GlcNAc anomeric              | 4.67                   |
| GlcNAc ring                  | 3.74, 3.58, 3.48, 3.44 |
| MurNAc amide                 | 8.11                   |
| MurNAc methyl                | 2.01                   |
| MurNAc ring *                | 4.43, 4.32             |
| Lac CH                       | 4.28                   |
| Lac methyl                   | 1.42                   |
| A NH                         | 8.41                   |
| A C $\alpha$ H               | 4.32                   |
| A methyl                     | 1.43                   |
| iE NH                        | 7.92                   |
| iE C $\alpha$ H              | 4.20                   |
| iE C $\beta$ H <sub>2</sub>  | 1.90, 2.10             |
| iE C $\gamma$ H <sub>2</sub> | 2.26                   |
| DAP NaH **                   | 8.11                   |
| DAP NbH **                   | 8.04                   |
| DAP CaH **                   | 4.43                   |
| DAP CbH **                   | 4.26                   |
| DAP CaH <sub>2</sub> **      | 1.74                   |
| DAP CbH <sub>2</sub> **      | 1.95                   |
| DAP CcH <sub>2</sub> **      | 1.69                   |

\* Note that the muramic acid sugar has been reduced, meaning that there is no anomeric proton for this sugar.

\*\* See structures for the locations of these protons

**Table S2.** Minimum inhibitory concentration (MIC) of beta lactams against *C. difficile* R20291 and *ldt<sub>Ca</sub>* isogenic mutants.

|                          | WT   | $\Delta ldt_{Ca1}$ | $\Delta ldt_{Ca2}$ | $\Delta ldt_{Ca3}$ | $\Delta ldt_{Ca1}$<br>$\Delta ldt_{Ca2}$ | $\Delta ldt_{Ca1}$<br>$\Delta ldt_{Ca3}$ | $\Delta ldt_{Ca2}$<br>$\Delta ldt_{Ca3}$ | $\Delta ldt_{Ca1}$<br>$\Delta ldt_{Ca2}$<br>$\Delta ldt_{Ca3}$ |
|--------------------------|------|--------------------|--------------------|--------------------|------------------------------------------|------------------------------------------|------------------------------------------|----------------------------------------------------------------|
| <b>Penicillins</b>       |      |                    |                    |                    |                                          |                                          |                                          |                                                                |
| Amoxicillin              | 4    | 4                  | 4                  | 4                  | 4                                        | 4                                        | 2                                        | 2                                                              |
| Co-amoxicillin           | 2    | 2                  | 1                  | 1                  | 2                                        | 2                                        | 2                                        | 2                                                              |
| Piperacillin             | 16   | 16                 | 16                 | 16                 | 16                                       | 16                                       | 16                                       | 16                                                             |
| Piperacillin-tazobactam  | 16   | 16                 | 16                 | 16                 | 16                                       | 16                                       | 16                                       | 16                                                             |
| <b>Cephalosporins</b>    |      |                    |                    |                    |                                          |                                          |                                          |                                                                |
| Cephalotin <sup>a</sup>  | >256 | >256               | >256               | >256               | >256                                     | >256                                     | 256                                      | 256                                                            |
| Cephalexin <sup>a</sup>  | >256 | >256               | >256               | >256               | >256                                     | >256                                     | >256                                     | >256                                                           |
| Cefuroxime <sup>b</sup>  | >256 | >256               | >256               | >256               | >256                                     | >256                                     | >256                                     | >256                                                           |
| Cefoxitin <sup>b</sup>   | >256 | >256               | >256               | >256               | >256                                     | >256                                     | >256                                     | >256                                                           |
| Ceftriaxone <sup>c</sup> | 128  | 128                | 128                | 128                | 128                                      | 128                                      | 128                                      | 128                                                            |
| Cefotaxime <sup>c</sup>  | >256 | >256               | >256               | >256               | >256                                     | >256                                     | >256                                     | >256                                                           |
| <b>Carbapenems</b>       |      |                    |                    |                    |                                          |                                          |                                          |                                                                |
| Meropenem                | 8    | 8                  | 8                  | 8                  | 8                                        | 8                                        | 8                                        | 8                                                              |
| Imipenem                 | 32   | 32                 | 16                 | 32                 | 16                                       | 16                                       | 16                                       | 16                                                             |
| <b>Glycopeptides</b>     |      |                    |                    |                    |                                          |                                          |                                          |                                                                |
| Vancomycin               | 1    | 1                  | 1                  | 1                  | 1                                        | 1                                        | 1                                        | 2                                                              |

<sup>a</sup> first generation cephalosporins

<sup>b</sup> second generation cephalosporins

<sup>c</sup> third generation cephalosporins

**Table S3.** Quantification of Ldt<sub>Cd2</sub> endopeptidase activity against a 3-4 crosslinked dimer <sup>a</sup>

|                                        | <b>3-4 dimer</b> | <b>3-4 dimer + Ldt2</b> |
|----------------------------------------|------------------|-------------------------|
| <b>gm-AEJA=gm-AEJA</b>                 | 99.963%          | 0.093%                  |
| <b>gm-AEJ=gm-AEJA - H<sub>2</sub>O</b> | 0                | 86.014%                 |
| <b>gm-AEJ=gm-AEJA</b>                  | 0                | 13.861%                 |
| <b>gm-AEJ</b>                          | 0                | 0.032% <sup>b</sup>     |
| <b>gm-AEJA</b>                         | 0.037%           | 0                       |
|                                        | 100.0%           | 100.0%                  |

<sup>a</sup> Abundance was calculated based on Ion intensity.

<sup>b</sup> The low abundance of gm-AEJ corresponds to carboxy-peptidase activity on traces of gm-AEJA present in the substrate

**Table S4.** Bacterial strains, plasmids, and oligonucleotides.

| Strains/plasmids/<br>oligonucleotides            | Relevant properties/sequence                                                                                                    | Source    |
|--------------------------------------------------|---------------------------------------------------------------------------------------------------------------------------------|-----------|
| <b>Strains</b>                                   |                                                                                                                                 |           |
| <i>Clostridioides difficile</i>                  |                                                                                                                                 |           |
| R20291                                           | Clinical isolate, ribotype 027                                                                                                  | (1)       |
| R20291 $\Delta$ ldt1                             | R20291 derivative with an in-frame deletion in <i>ldt<sub>ca1</sub></i>                                                         | This work |
| R20291 $\Delta$ ldt2                             | R20291 derivative with an in-frame deletion in <i>ldt<sub>ca2</sub></i>                                                         | This work |
| R20291 $\Delta$ ldt3                             | R20291 derivative with an in-frame deletion in <i>ldt<sub>ca3</sub></i>                                                         | This work |
| R20291 $\Delta$ ldt2 $\Delta$ ldt1               | R20291 derivative with an in-frame deletion in <i>ldt<sub>ca2</sub></i> and <i>ldt<sub>ca1</sub></i>                            | This work |
| R20291 $\Delta$ ldt3 $\Delta$ ldt1               | R20291 derivative with an in-frame deletion in <i>ldt<sub>ca3</sub></i> and <i>ldt<sub>ca1</sub></i>                            | This work |
| R20291 $\Delta$ ldt3 $\Delta$ ldt2               | R20291 derivative with an in-frame deletion in <i>ldt<sub>ca3</sub></i> and <i>ldt<sub>ca2</sub></i>                            | This work |
| R20291 $\Delta$ ldt2 $\Delta$ ldt1 $\Delta$ ldt3 | R20291 derivative with an in-frame deletion in <i>ldt<sub>ca2</sub></i> , <i>ldt<sub>ca1</sub></i> and <i>ldt<sub>ca3</sub></i> | This work |
| R20291 $\Delta$ Paloc                            | R20291 derivative with a deletion in the genes encoding toxins                                                                  | (2)       |
| <i>Escherichia coli</i>                          |                                                                                                                                 |           |
| NEB5alpha                                        | Cloning strain                                                                                                                  | NEB       |
| BL21(DE3)                                        | Expression strain                                                                                                               | NEB       |
| CA434                                            | HB101 derivative carrying R702                                                                                                  | (3)       |
| <b>Plasmids</b>                                  |                                                                                                                                 |           |
| pJAK112                                          | Plasmid for gene replacement in <i>C. difficile</i>                                                                             | (4)       |
| pNG007                                           | pJAK derivative containing homology regions flanking a 1332bp <i>ldt<sub>ca1</sub></i>                                          | This work |
| pNG008                                           | pJAK derivative containing homology regions flanking a 1695bp <i>ldt<sub>ca2</sub></i>                                          | This work |
| pNG009                                           | pJAK derivative containing homology regions flanking a 753bp <i>ldt<sub>ca3</sub></i>                                           | This work |
| pET2818                                          | pET derivative for expression of His-tagged recombinant proteins                                                                | (5)       |
| pET-Ldt1                                         | pET2818 derivative expressing Ldt <sub>ca1</sub> (residues 3-289; C-terminal His-tag)                                           | This work |
| pET-Ldt2                                         | pET2818 derivative expressing Ldt <sub>ca1</sub> (residues 41-164; N-terminal His-tag)                                          | This work |
| pET-Ldt3                                         | pET2818 derivative expressing Ldt <sub>ca1</sub> (residues 38-469; N-terminal His-tag)                                          | This work |
| <b>Oligonucleotides</b>                          |                                                                                                                                 |           |
| RF_21 (pJAK112)                                  | GGATTTTCACATTTGCCGTTTTGTAAAC                                                                                                    |           |
| RF_22 (pJAK112)                                  | GATCTTTTCTACGGGGTCTGAC                                                                                                          |           |
| RF1795 ( <i>ldt<sub>ca1</sub></i> locus)         | GCTTTTACTTTGATACTGTCTGCTG                                                                                                       |           |
| RF1796 ( <i>ldt<sub>ca1</sub></i> locus)         | ATGACAAACTTAAGGAAAGATGGCC                                                                                                       |           |
| RF1797 ( <i>ldt<sub>ca2</sub></i> locus)         | GGATTCAGTTCCTGAATAACTAGGT                                                                                                       |           |
| RF1798 ( <i>ldt<sub>ca2</sub></i> locus)         | GCAGTTGGTGAATCAGTAGAAAAAC                                                                                                       |           |
| RF1799 ( <i>ldt<sub>ca3</sub></i> locus)         | GGAGGAGATATTAGAGACTATGAAG                                                                                                       |           |
| RF1800 ( <i>ldt<sub>ca3</sub></i> locus)         | CGTGTTTATGCACATCCAACATATG                                                                                                       |           |

- (1) Stabler, R. A., He, M., Dawson, L., Martin, M., Valiente, E., Corton, C., Lawley, T. D., Sebahia, M., Quail, M. A., Rose, G., Gerding, D. A., Gibert, M., Popoff, M. R., Parkhill, J., Dougan, G. and Wren, B. W. (2009) Comparative genome and phenotypic analysis of *Clostridium difficile* 027 strains provides insight into the evolution of a hypervirulent bacterium. *Genome Biology* **10** R102
- (2) Buddle, J., Wright, R. C. T., Turner, C. E., Chaudhuri, R. R., Brockhurst, M. A. and Fagan, R. P. (2023) Multiple evolutionary pathways lead to vancomycin resistance in *Clostridioides difficile*. *BioRxiv*
- (3) Woods, C., Humphreys, C. M., Mesquita Rodrigues, R., Ingle, P., Rowe, P., Henstra, A. M., Köpke, M., Simpson, S. D., Winzer, K. and Minton, N. P. (2019) A novel conjugal donor strain for improved DNA transfer into *Clostridium* spp. *Anaerobe* **59**:184-191
- (4) Fuchs, M., Lamm-Schmidt, V., Sulzer, J., Ponath, F., Jenniches, L., Kirk, J. A., Fagan, R. P., Barquist, L., Vogel, J. and Faber, F. (2021) An RNA-centric global view of *Clostridioides difficile* reveals broad activity of Hfq in a clinically important gram-positive bacterium. *Proc Natl Acad Sci USA* **118**(25): e2103579118
- (5) Eckert, C., Lecerf, M., Dubost, L., Arthur, M. and Mesnage, S. (2006) Functional analysis of AtlA, the major N-acetylglucosaminidase of *Enterococcus faecalis*. *J Bacteriol.* **188**(24):8513-8519
